# Supplementary material for: Implementation of Antibiotic Stewardship Improves the Quality of Blood Culture Diagnostics at an Intensive Care Unit of a University Hospital
Source: MDPI journal article supplement (doi:10.3390/jcm11133675), 2022-06-25
Supplement: s1 [file s1]

**Implementation of Antibiotic Stewardship improves the quality of blood culture diagnostics at an intensive care unit of a university hospital**

Sarah V. Walker<sup>1,2,3 \*</sup>, Benedict Steffens<sup>1,2</sup>, David Sander<sup>1,4</sup> and Wolfgang A. Wetsch<sup>1,4</sup>

**Supplementary Data:**

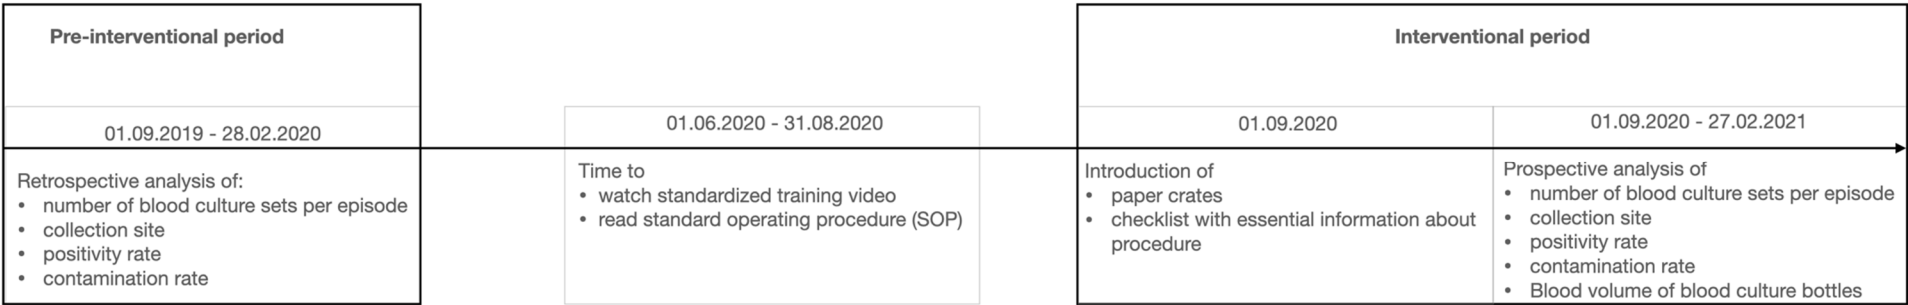

*Supplementary Figure S1: Graphical abstract of timeline and intervention tools of the study.*

| Species                                 | Pre-intervention | Post-intervention |
|-----------------------------------------|------------------|-------------------|
| Contaminant species                     | 27               | 23                |
| <i>Bacillus cereus</i>                  | 0                | 1                 |
| <i>Bacteroides uniformis</i>            | 0                | 1                 |
| <i>Corynebacterium spp.</i>             | 1                | 0                 |
| <i>Staphylococcus arlettae</i>          | 0                | 1                 |
| <i>Staphylococcus capitis</i>           | 3                | 2                 |
| <i>Staphylococcus haemolyticus</i>      | 3                | 2                 |
| <i>Staphylococcus hominis</i>           | 2                | 2                 |
| <i>Staphylococcus. epidermidis</i>      | 17               | 14                |
| <i>Stenotrophomonas maltophilia</i>     | 1                | 0                 |
| Pathogenic species                      | 81               | 60                |
| <i>Acinetobacter dijkshorniae</i>       | 1                | 0                 |
| <i>Bacteroides cellulosilyticus</i>     | 0                | 1                 |
| <i>Bacteroides ovatus</i>               | 2                | 0                 |
| <i>Candida albicans</i>                 | 5                | 1                 |
| <i>Candida dublinensis</i>              | 2                | 0                 |
| <i>Candida glabrata</i>                 | 2                | 13                |
| <i>Candida krusei</i>                   | 3                | 0                 |
| <i>Candida spp. (not identified)</i>    | 1                | 0                 |
| <i>Enterobacter cloacae</i>             | 5                | 0                 |
| <i>Enterococcus faecalis</i>            | 0                | 4                 |
| <i>Enterococcus faecium</i>             | 36               | 9                 |
| <i>Escherichia coli</i>                 | 9                | 11                |
| <i>Klebsiella pneumoniae</i>            | 6                | 4                 |
| <i>Klebsiella spp. (not identified)</i> | 1                | 0                 |
| <i>Klebsiella varicola</i>              | 1                | 0                 |
| <i>Pseudomonas aeruginosa</i>           | 1                | 0                 |
| <i>Staphylococcus aureus</i>            | 1                | 11                |
| <i>Staphylococcus epidermidis</i>       | 0                | 6                 |
| <i>Staphylococcus lugdunensis</i>       | 2                | 0                 |
| <i>Streptococcus anginosus</i>          | 2                | 0                 |
| <i>Streptococcus constellatus</i>       | 1                | 0                 |

**Supplementary Table S1:** Species distribution of contaminant and pathogenic species of the pre-intervention and post-intervention period.
